# Supplementary material for: A tuneable hierarchical self-assembly of a C3-symmetric triaminoguanidinium-derivative into a rhombic dodecahedral morphology
Source: Royal Society of Chemistry journal article supplement (doi:10.1039/d0ce00909a), 2020-01-01
Supplement: d0ce00909a1.pdf [file d0ce00909a1.pdf]

## SUPPORTING INFORMATION

---

### Supporting Information

# **Tuneable Hierarchical Self-Assembly of C<sub>3</sub>-Symmetric Triaminoguanidinium-derivative into Rhombic Dodecahedral Morphology**

*Ananta Dey,<sup>[a,b]</sup> Arunava Maity,<sup>[a]</sup> Tufan Singha Mahapatra,<sup>[a,c]</sup> Eingathodi Suresh,<sup>[a,b]</sup> Amal Kumar Mandal,<sup>\*,[a,b]</sup> and Amitava Das<sup>\*,[a,b,d]</sup>*

<sup>[a]</sup> Analytical and Environmental Science Division and Centralized Instrument Facility,  
CSIR-Central Salt and Marine Chemicals Research Institute,  
Bhavnagar, Gujarat-364002, India.  
E-mail: [a.das@csmcri.res.in](mailto:a.das@csmcri.res.in)

<sup>[b]</sup> Academy of Scientific and Innovative Research (AcSIR),  
CSIR- Human Resource Development Centre,  
(CSIR-HRDC) Campus, Sector 19, Kamla Nehru Nagar,  
Ghaziabad, Uttar Pradesh-201 002, India.

<sup>[c]</sup> ICFAI Science School (Chemistry),  
ICFAI University Tripura,  
Agartala-799210, Tripura (W), India.

<sup>[d]</sup> Department of Chemical Sciences  
Indian Institute of Science Education and Research Kolkata,  
Mohanpur, 741 246, West Bengal, India.  
Email: [amitava@iiserkol.ac.in](mailto:amitava@iiserkol.ac.in)

| No  | Table of Contents                                             | Page No |
|-----|---------------------------------------------------------------|---------|
| 1.  | Materials and Characterization                                | 3       |
| 2.  | Synthesis of L                                                | 3       |
| 3.  | $^1\text{H}$ NMR & $^{13}\text{C}$ NMR spectrum of L          | 4       |
| 4.  | HRMS & IR spectrum of L                                       | 5       |
| 5.  | Methods of sample preparation for FE-SEM                      | 5       |
| 6.  | FE-SEM images of L at 2.0 mg/mL concentration                 | 6       |
| 7.  | FE-SEM images of L at 0.5 mg/mL concentration                 | 7       |
| 8.  | Determination of the degree of aggregation ( $\alpha_{agg}$ ) | 7       |
| 9.  | UV-Vis spectral data in DMSO/water solvent                    | 8       |
| 10. | Crystal data in DMSO/water solvent                            | 9       |
| 11. | Packing and H-bonding interactions of L1 and L2               | 11      |
| 12. | PXRD pattern of L in DMSO/water                               | 12      |
| 13. | FE-SEM image of L in DMSO/water (3:1 v/v)                     | 13      |
| 14. | FE-SEM image of L in DMSO/water (1:1 v/v)                     | 14      |
| 15. | UV-Vis spectral data in DMF/water solvent                     | 15      |
| 16. | Crystal data in DMF/water solvent                             | 15      |
| 17. | PXRD pattern of L in DMF/water                                | 17      |

## 1. Materials and Characterization:

**Materials:** All the chemicals used for the synthesis of L purchased from Sigma-Aldrich Chem. Co. and were used as received without any further purification. All solvents were of reagent grade and procured from local companies. All solvents were dried and distilled before use by following standard procedures.

**Characterization:** Geol resonance ECZ600R spectrometer was used for  $^1\text{H}$  NMR study. Agilent 6545 Q-TOF LC/MS instrument was used for mass spectroscopic measurement. Using a Shimadzu Corp 80109, UV-Vis spectrophotometer equipped with a Peltier system UV-Vis absorption spectra were measured. A Perkin Elmer 883 spectrometer was used for FT-IR spectroscopy using KBr pellets in the range of  $4000\text{ cm}^{-1}$  –  $400\text{ cm}^{-1}$ . FE-SEM images were collected using a JEOL JSM-7100F instrument operated at an 18 kV accelerating voltage. An ultrathin coating of Au ( $\sim 4\text{ nm}$ ) was deposited via high vacuum evaporation. A Philips X'pert X-ray powder diffractometer using  $\text{Cu-K}\alpha$  radiation ( $\lambda = 1.5418\text{ \AA}$ ) over a  $2\theta$  range of  $5$ – $60$  was used for recording the powder X-ray diffraction. Single crystal data was collected on a BRUKER SMART APEX (CCD) diffractometer equipped with a graphite monochromator and Mo-K $\alpha$  radiation ( $\lambda = 0.71073\text{ \AA}$ ) at 150 K. Using the SMART and SAINT software packages data collection and reduction were accomplished.<sup>1</sup> Multiscan empirical absorption corrections were applied to the data using the program SADABS.<sup>2</sup> The full-matrix least-squares technique was followed to solve the structure using SHELXTL and was refined on F2.<sup>3</sup> Crystallographic data (excluding structure factors) of L have been deposited in the Cambridge Crystallographic Data Centre as supplementary publications with CCDC no -1886920 and 1961480.

## 2. Synthesis of L:

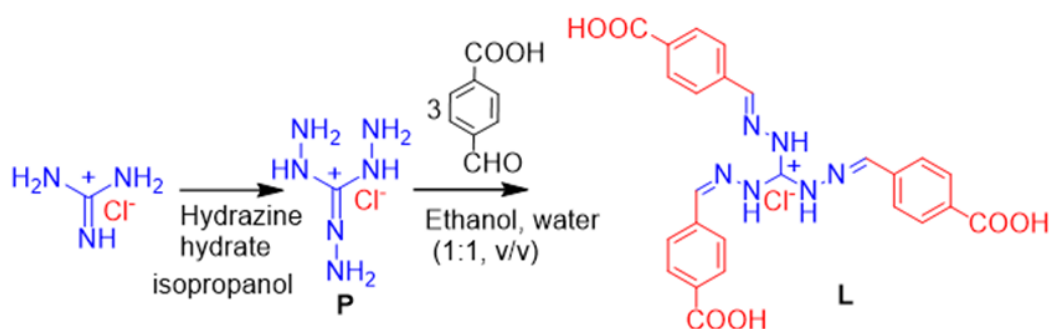

**Figure S1:** Synthesis route of L.

**Synthesis of P:** Triaminoguanidinium chloride was prepared by the literature method.<sup>4</sup>

**Synthesis of L:** Triaminoguanidinium chloride (0.5 gm, 3.5 mmol) and 4-formylbenzoic acid (1.5 gm, 10.6 mmol) were dissolved in a (1:1 v/v) ethanol/water mixture and stirred for 4h at  $90\text{ }^{\circ}\text{C}$ . After that, the resulting mixture was cooled to room temperature. After some time, a large amount of yellowish-white

## SUPPORTING INFORMATION

precipitate was obtained. The desired product was washed using ethanol and dried under reduced pressure. Yield 1.5 gm (82%).  $^1\text{H}$  NMR (600 MHz, DMSO- $d_6$ ):  $\delta$  ppm 8.75 (3H, s), 8.10-8.06 (12H, m).  $^{13}\text{C}$  NMR (125 MHz, DMSO- $d_6$ ): 166.9, 150.6, 147.6, 138.0, 131.7, 129.5, 127.5. (FT - IR) ( $\nu$   $\text{cm}^{-1}$ ): -C=N str. frequency ( $\sim 1600.8$   $\text{cm}^{-1}$ ),  $\nu_{\text{C=O}}$  1713.9  $\text{cm}^{-1}$ ,  $\nu_{\text{OH}}$  3477.4  $\text{cm}^{-1}$ . HRMS:  $m/z$  calculated for  $[\text{M}]^+$  ( $\text{C}_{25}\text{H}_{21}\text{N}_9$ ) $^+$ : 501.4785; found: 501.1594. Elemental analysis calculated for  $\text{C}_{25}\text{H}_{21}\text{ClNO}_6$ : C, 55.92; H, 3.94; N, 15.65. Found C, 55.90; H, 3.90; N, 15.63.

### 3. $^1\text{H}$ NMR & $^{13}\text{C}$ NMR spectrum of L:

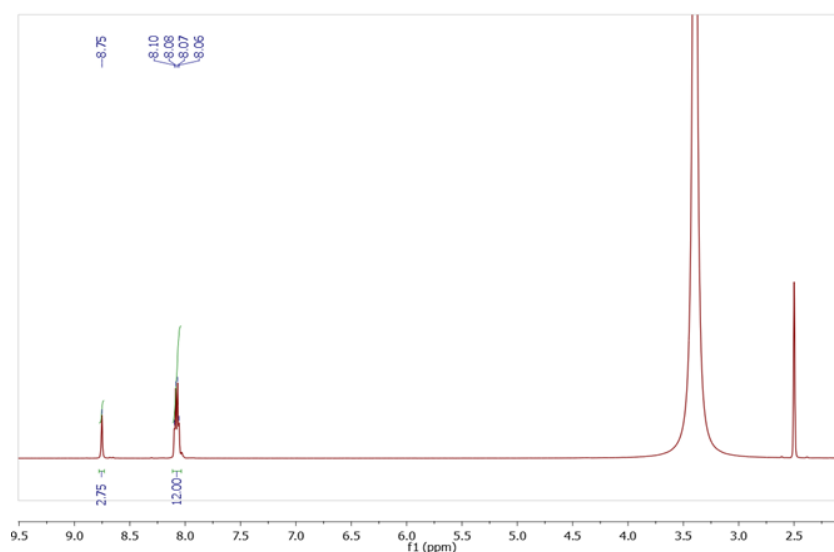

**Figure S2:**  $^1\text{H}$  NMR spectrum of L recorded in DMSO- $d_6$ .

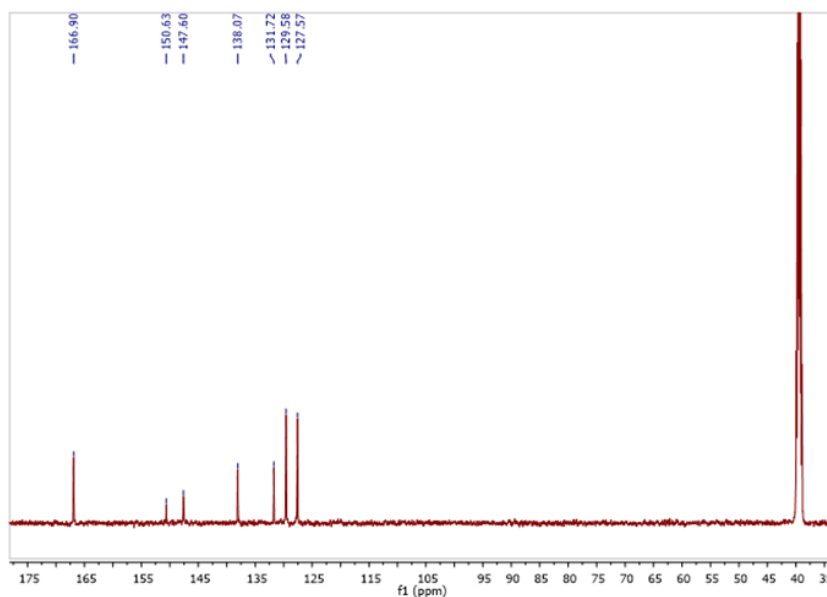

**Figure S3:**  $^{13}\text{C}$  NMR spectrum of L recorded in DMSO- $d_6$ .

### 4. HRMS & IR spectrum of L:

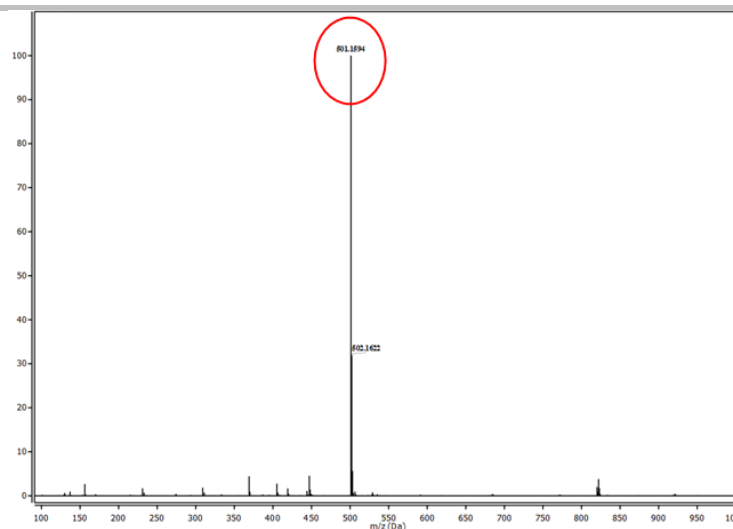

**Figure S4:** HRMS spectrum of L recorded in Methanol.

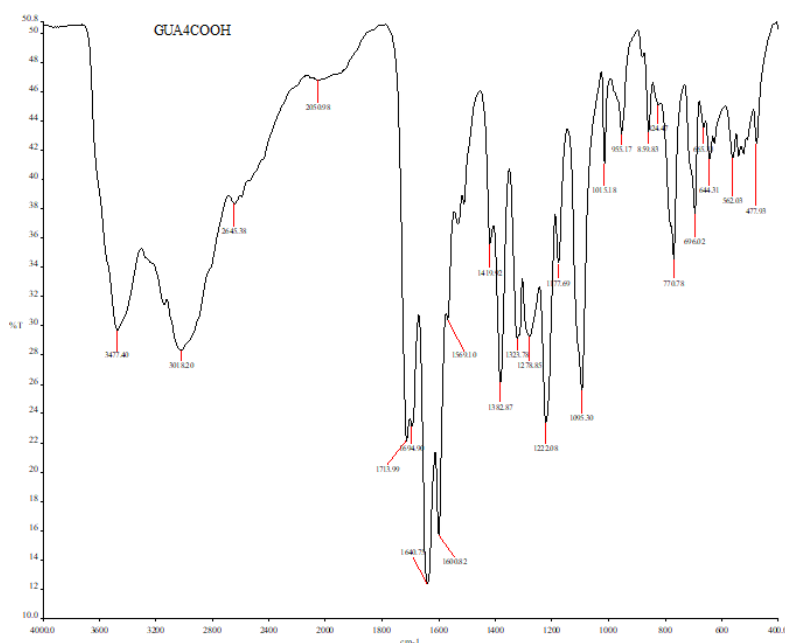

**Figure S5:** FT-IR spectrum of L recorded using KBr plate,  $\nu_{\text{C=N}}$  str. frequency ( $\sim 1600.8 \text{ cm}^{-1}$ ),  $\nu_{\text{C=O}}$   $1713.9 \text{ cm}^{-1}$ ,  $\nu_{\text{OH}}$   $3477.4 \text{ cm}^{-1}$ .

## 5. Methods of sample preparation for FE-SEM:

The self-assembled microstructure and its formation mechanism were studied in DMSO/water and DMF/water solvent mixtures. First, a solution of L was prepared in pure DMSO with a concentration of 1mg/ml. 300  $\mu\text{L}$  of this solution exposed to (2:1, v/v DMSO/water, 900  $\mu\text{L}$ ), (1:2 v/v DMSO/water, 900  $\mu\text{L}$ ), and 900  $\mu\text{L}$  of water to prepare three different solutions of same effective concentration with the effective solvent composition of 3:1; 1:1 and 1:3 v/v DMSO/water. After vigorous shaking for one minute, the effective solutions were left undisturbed for about 10 minutes to stabilize. From that solution, 20 microlitre was drop-cast on Si (100). Finally, it was dried under a desiccator. Before taking images,

## SUPPORTING INFORMATION

samples were coated with gold vapor. Similarly, we prepared three different solutions of the same effective concentration with the solvent composition of 3:1; 1:1 and 1:3; v/v DMF/water, to study the self-assembly morphology in DMF/water solvent system.

### 6. FE-SEM images of L at 2.0 mg/mL concentration:

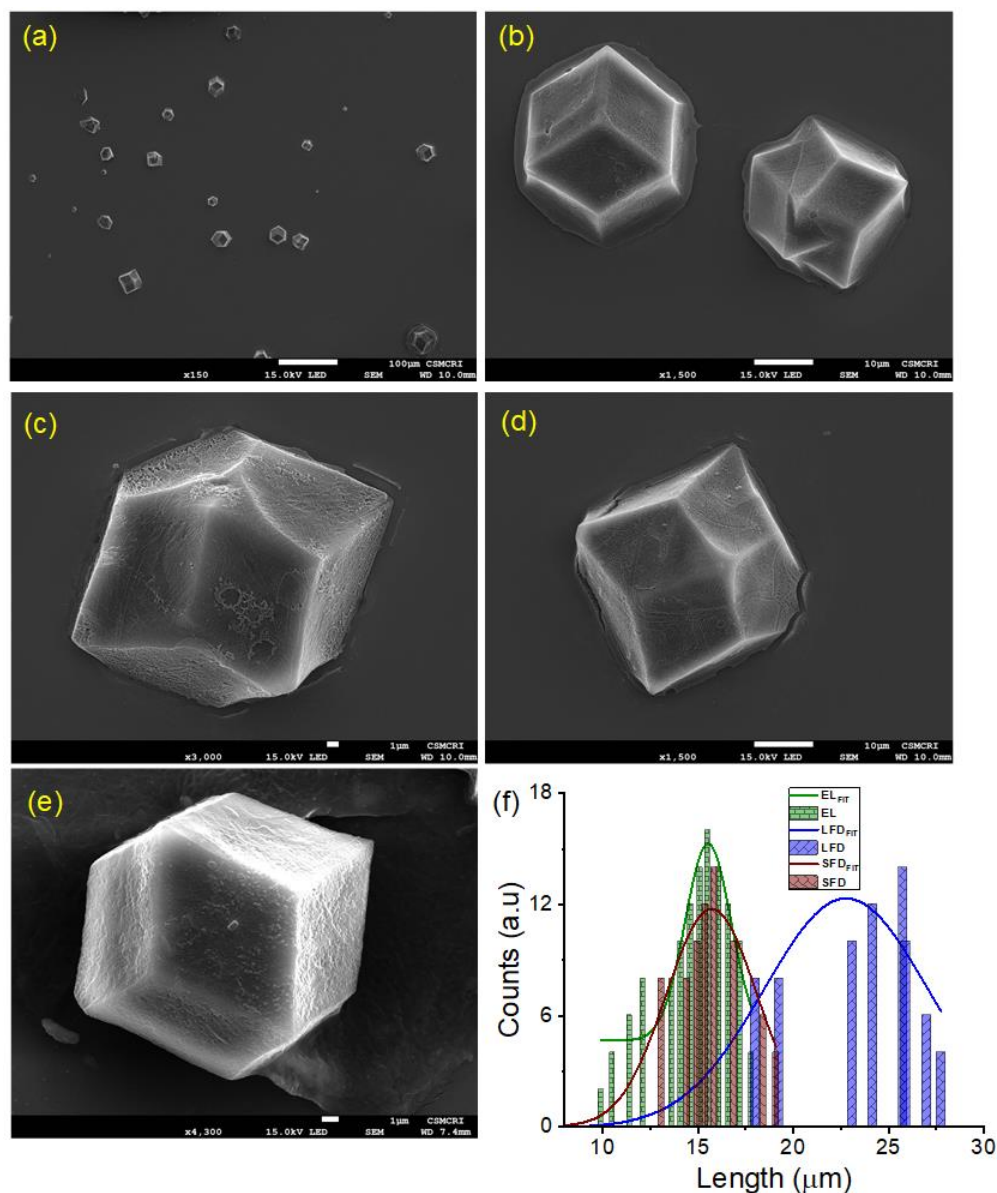

**Figure S6:** (a) – (e) FE-SEM image of self-assembled RD morphology of L, in DMSO/water (1:3 v/v) solvent system at a concentration of 2.0 mg/mL. (b) Statistical plot of length distribution histogram of RD morphology. LFD: blue bar; SFD: brown bar; EL: green bar, Solid line is the corresponding Gaussian fit. LFD: long face diagonal; SFD: short face diagonal; EL: edge length.

### 7. FE-SEM images of L at 0.5 mg/mL concentration:

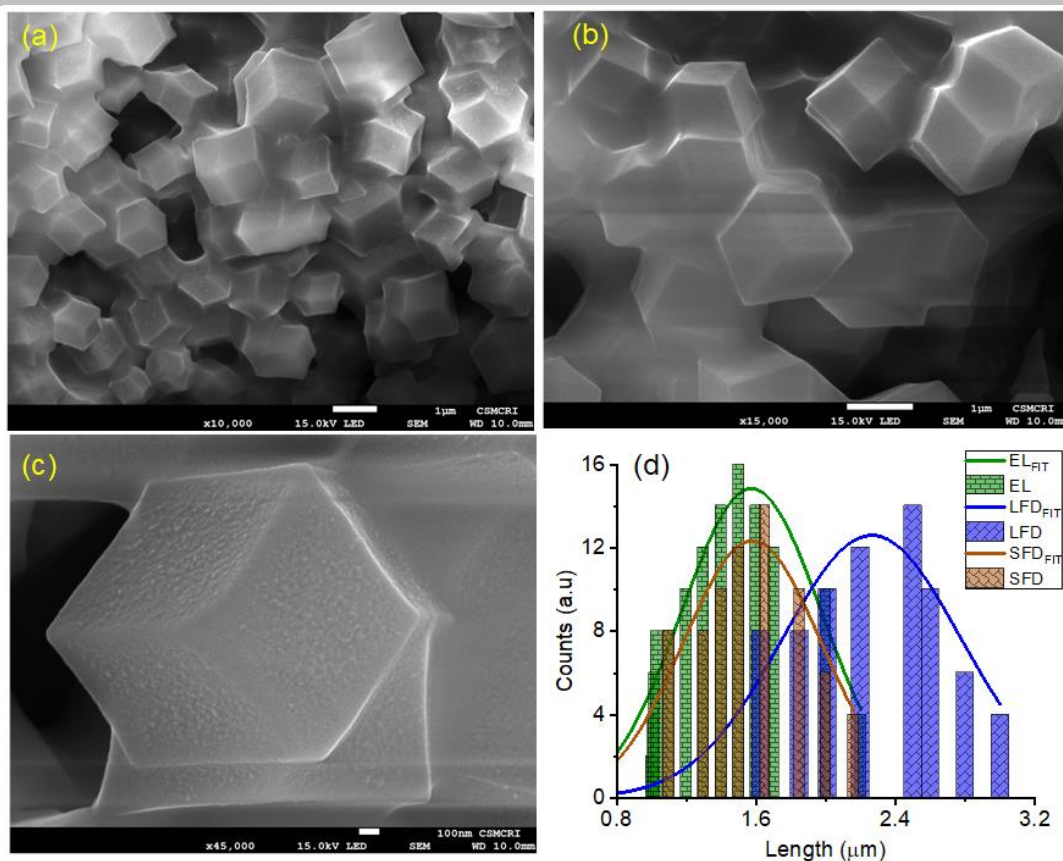

**Figure S7:** (a) – (c) FE-SEM image of self-assembled RD morphology of L, in DMSO/water (1:3 v/v) solvent system at a concentration of 0.5 mg/mL. (b) Statistical plot of length distribution histogram of RD morphology. LFD: blue bar; SFD: brown bar; EL: green bar, Solid line is the corresponding Gaussian fit. LFD: long face diagonal; SFD: short face diagonal; EL: edge length.

### 8. Determination of the degree of aggregation ( $\alpha_{agg}$ ):

The degree of aggregation ( $\alpha_{agg}$ ) was calculated from the temperature-dependent UV-Vis spectral data by using the equation (1) as mentioned below.

$$\alpha(T) = \frac{\varepsilon(T) - \varepsilon_M}{\varepsilon_A - \varepsilon_M} \dots \dots \dots (1)$$

Where  $\varepsilon(T)$  is the measured extinction coefficient at temperature  $T$ ;  $\varepsilon_M$  and  $\varepsilon_A$  are the extinction coefficients of the monomer and fully aggregated state, respectively. The latter two values determined from the spectral data at high and low temperatures, respectively.

The experimentally determined degree of aggregation was fitted temperature-dependent isodesmic self-assembly model accordingly with equation (2) as mentioned below to obtain the enthalpy value  $\Delta H$ .

$$\alpha(T) = \frac{1}{1 + \exp[-0.908 \Delta H \frac{T - T_m}{RT_m^2}]} \dots \dots \dots (2)$$

Where  $\alpha$  is the degree of aggregation, and  $T_m$  is the melting temperature was defined as the temperature at  $\alpha = 0.5$  at  $T = T_m$ . R is the Boltzmann constant.

## SUPPORTING INFORMATION

From the experimentally determined degree of aggregation, the number-averaged degree of polymerization,  $DP_N$ , calculated temperature-dependent isodesmic self-assembly model accordingly with equation (3), as mentioned below.

$$DP_N(T) = \frac{1}{\sqrt{1 - \alpha(T)}} \dots \dots \dots (3)$$

From the number-averaged degree of polymerization,  $DP_N$ , and the known concentration of molecules,  $C_T$ , the equilibrium constant  $K_e$  was determined as a function of temperature using equation (4) as mentioned below.

$$DP_N(T) = \frac{1}{2} + \frac{1}{2} \sqrt{4K_e(T)C_T + 1} \dots \dots \dots (4)$$

### 9. UV-Vis spectral data in DMSO/water solvent:

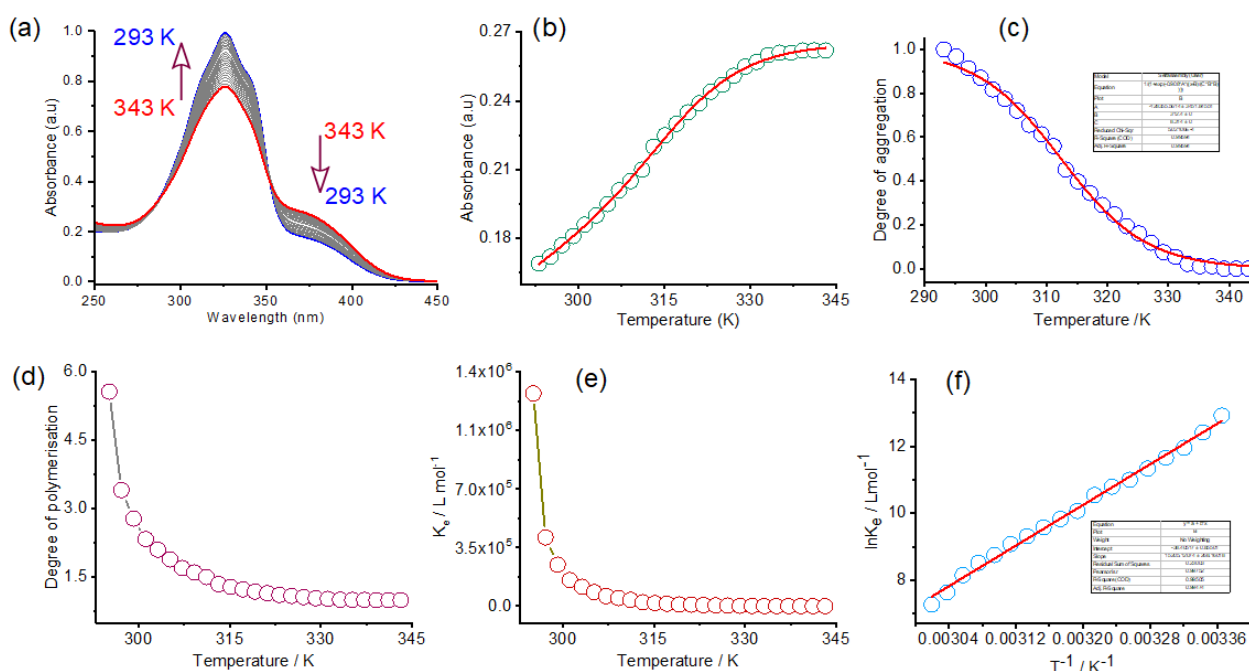

**Figure S8:** (a) Variable temperature UV-Vis spectra of L ( $1.0 \times 10^{-5}$  M) in DMSO/water (1:3 v/v). (b) Corresponding plot of change of absorbance at 377 nm with temperature. (c) Temperature-dependent degree of aggregation, calculated from UV-Vis spectral change at 377 nm and corresponding isodesmic fit. (d) Corresponding plot of the degree of polymerization,  $DP_N$ , as a function of temperature. (e) Corresponding plot of the equilibrium constant,  $K_e$ , as a function of temperature. (f) Corresponding Van't Hoff plot for L in DMSO/water (1:3 v/v).

### 10. Crystal data in DMSO/water solvent:

60 mg of compound L was dissolved in 3 mL of DMSO and taken in a screw-capped vial. After that, 100 microliter water was added. The solution was gently heated, then kept it in a 10 ml beaker with no



## SUPPORTING INFORMATION

mechanical disturbance for allowing the crystals of L to grow. After ~two weeks of high-quality rod-shaped yellow coloured crystals were obtained, which was used for X-ray diffraction.

**Table S1.** Parameters and refinement data for crystal L1, a DMSO hydrate of composition  $(C_{25}H_{21}N_6O_6) + \cdot 2(C_2H_6O_S) \cdot Cl \cdot H_2O$ , obtained from DMSO/water solvent.

|                                                     |                           |
|-----------------------------------------------------|---------------------------|
| Compound reference                                  | L1                        |
| Chemical formula                                    | $C_{29}H_{35}ClN_6O_9S_2$ |
| Formula Mass                                        | 711.20                    |
| Crystal system                                      | Triclinic                 |
| Space group                                         | $P\bar{1}$                |
| Crystal color                                       | Colourless                |
| Crystal size/mm <sup>3</sup>                        | 0.34×0.19×0.18            |
| $a/\text{\AA}$                                      | 10.3837(18)               |
| $b/\text{\AA}$                                      | 11.2946(19)               |
| $c/\text{\AA}$                                      | 15.743(3)                 |
| $\alpha/^\circ$                                     | 88.521(3)                 |
| $\beta/^\circ$                                      | 89.943(3)                 |
| $\gamma/^\circ$                                     | 68.863(3)                 |
| $V/\text{\AA}^3$                                    | 1721.5(5)                 |
| $Z$                                                 | 2                         |
| $D_c/\text{g cm}^{-3}$                              | 1.372                     |
| $\mu (\text{mm}^{-1})$                              | 0.291                     |
| $F(000)$                                            | 744                       |
| $T/^\circ\text{K}$                                  | 150(2)                    |
| Total reflns                                        | 13415                     |
| R(int)                                              | 0.0363                    |
| Unique reflns                                       | 6678                      |
| Observed reflns<br>( $I > 2\sigma(I)$ )             | 4796                      |
| Parameters                                          | 516                       |
| $R_1 (I > 2\sigma(I))$<br>$wR_2(\text{all reflns})$ | 0.0634, 0.1578            |
| GOF ( $F^2$ )                                       | 1.034                     |

## SUPPORTING INFORMATION

|             |         |
|-------------|---------|
| CCDC number | 1886920 |
|-------------|---------|

$$R_I = \Sigma (|F_o| - |F_c|) / \Sigma |F_o|, wR_2 = [\Sigma w(|F_o| - |F_c|)^2 / \Sigma w(F_o)^2]^{1/2}, w = 0.75 / (\sigma^2(F_o) + 0.0010 F_o^2)$$

**Table S2.** Details of hydrogen bonding interactions observed in the crystal structure of L1 and L2.

| D-H...A                                                                                                                                                                                    | d(H...A) (Å) | d(D...A) (Å) | ∠D-H...A (°) |
|--------------------------------------------------------------------------------------------------------------------------------------------------------------------------------------------|--------------|--------------|--------------|
| <b>L1</b>                                                                                                                                                                                  |              |              |              |
| N1-H1D...C11 <sup>1</sup>                                                                                                                                                                  | 2.60(3)      | 3.281(3)     | 147(3)       |
| N3-H3D...O7 <sup>2</sup>                                                                                                                                                                   | 2.12(4)      | 2.834(4)     | 155(3)       |
| O9-H9E...C11 <sup>3</sup>                                                                                                                                                                  | 2.36(5)      | 3.158(3)     | 162(5)       |
| O2-H2C...O9 <sup>4</sup>                                                                                                                                                                   | 1.78(4)      | 2.585(4)     | 167(4)       |
| O3-H3C...C11 <sup>5</sup>                                                                                                                                                                  | 2.27(5)      | 3.015(3)     | 159(4)       |
| O5-H5C...O8 <sup>6</sup>                                                                                                                                                                   | 1.86(4)      | 2.643(4)     | 173(4)       |
| O9-H9F...O8 <sup>7</sup>                                                                                                                                                                   | 2.02(5)      | 2.786(4)     | 170(4)       |
| C10-H10...O7 <sup>5</sup>                                                                                                                                                                  | 2.45(3)      | 3.185(4)     | 139(3)       |
| C24-H24...O4 <sup>8</sup>                                                                                                                                                                  | 2.58(3)      | 3.378(4)     | 154(3)       |
| C26-H26A...O4 <sup>7</sup>                                                                                                                                                                 | 2.56         | 3.516(5)     | 166          |
| C26-H26B...O8 <sup>3</sup>                                                                                                                                                                 | 2.56         | 3.327(5)     | 135          |
| C27-H27B...O6 <sup>6</sup>                                                                                                                                                                 | 2.49         | 3.357(6)     | 147          |
| <b>Symmetry code :</b> 1. 1-x,-y,1-z; 2. -1+x,y,z; 3.x,y,z; 4. x,-1+y,1+z; 5. -1+x,y,z 6; -x,2-y,2-z; 7. 1-x,1-y,1-z; 8. x,y,1+z                                                           |              |              |              |
| <b>L2</b>                                                                                                                                                                                  |              |              |              |
| N1-H1...O7 <sup>1</sup>                                                                                                                                                                    | 2.07         | 2.882(4)     | 152          |
| O3-H3C...O9 <sup>2</sup>                                                                                                                                                                   | 1.73(5)      | 2.560(5)     | 168(5)       |
| O5-H5C...O8 <sup>3</sup>                                                                                                                                                                   | 1.78(5)      | 2.617(5)     | 158(5)       |
| N5-H5D...C11 <sup>4</sup>                                                                                                                                                                  | 2.42(4)      | 3.268(4)     | 154(3)       |
| C16-H16...C11 <sup>4</sup>                                                                                                                                                                 | 2.66         | 3.543(4)     | 155          |
| C18-H18...C11 <sup>4</sup>                                                                                                                                                                 | 2.64(4)      | 3.490(5)     | 140(3)       |
| C33-H33C...C11 <sup>5</sup>                                                                                                                                                                | 2.72(6)      | 3.549(6)     | 135(4)       |
| N3-H3D...C11 <sup>6</sup>                                                                                                                                                                  | 2.54(5)      | 3.301(4)     | 143(4)       |
| O2-H2C...C11 <sup>7</sup>                                                                                                                                                                  | 2.23(6)      | 3.010(4)     | 169(4)       |
| C2-H2...O7 <sup>1</sup>                                                                                                                                                                    | 2.41(4)      | 3.125(6)     | 135(3)       |
| C12-H12...O9 <sup>6</sup>                                                                                                                                                                  | 2.55(4)      | 3.407(6)     | 159(3)       |
| C13-H13...O3 <sup>8</sup>                                                                                                                                                                  | 2.58(4)      | 3.367(6)     | 144(4)       |
| C24-H24...O1 <sup>4</sup>                                                                                                                                                                  | 2.56(4)      | 3.532(6)     | 173(3)       |
| C27-H27A...O9 <sup>7</sup>                                                                                                                                                                 | 2.36(4)      | 3.348(6)     | 153(3)       |
| C31-H31...O4 <sup>9</sup>                                                                                                                                                                  | 2.40(5)      | 3.328(6)     | 157(4)       |
| C32-H32A...O1 <sup>7</sup>                                                                                                                                                                 | 2.55(6)      | 3.411(7)     | 141(4)       |
| C32-H32C...O8 <sup>10</sup>                                                                                                                                                                | 2.48(5)      | 3.470(8)     | 177(3)       |
| <b>Symmetry code :</b> 1. x,1/2-y,1/2+z; 2. -x,1/2+y,-1/2-z; 3. 1-x,1-y,2-z;4. -x,1/2+y,1/2-z; 5. 1+x,y,z; 6. x,1/2-y,-1/2+z; 7.x, y,z; 8. -1-x,1-y,-1-z; 9. -x,-1/2+y,1/2-z; 10. x,y,-1+z |              |              |              |

## SUPPORTING INFORMATION

### 11. Packing and H-bonding interactions of L1 and L2:

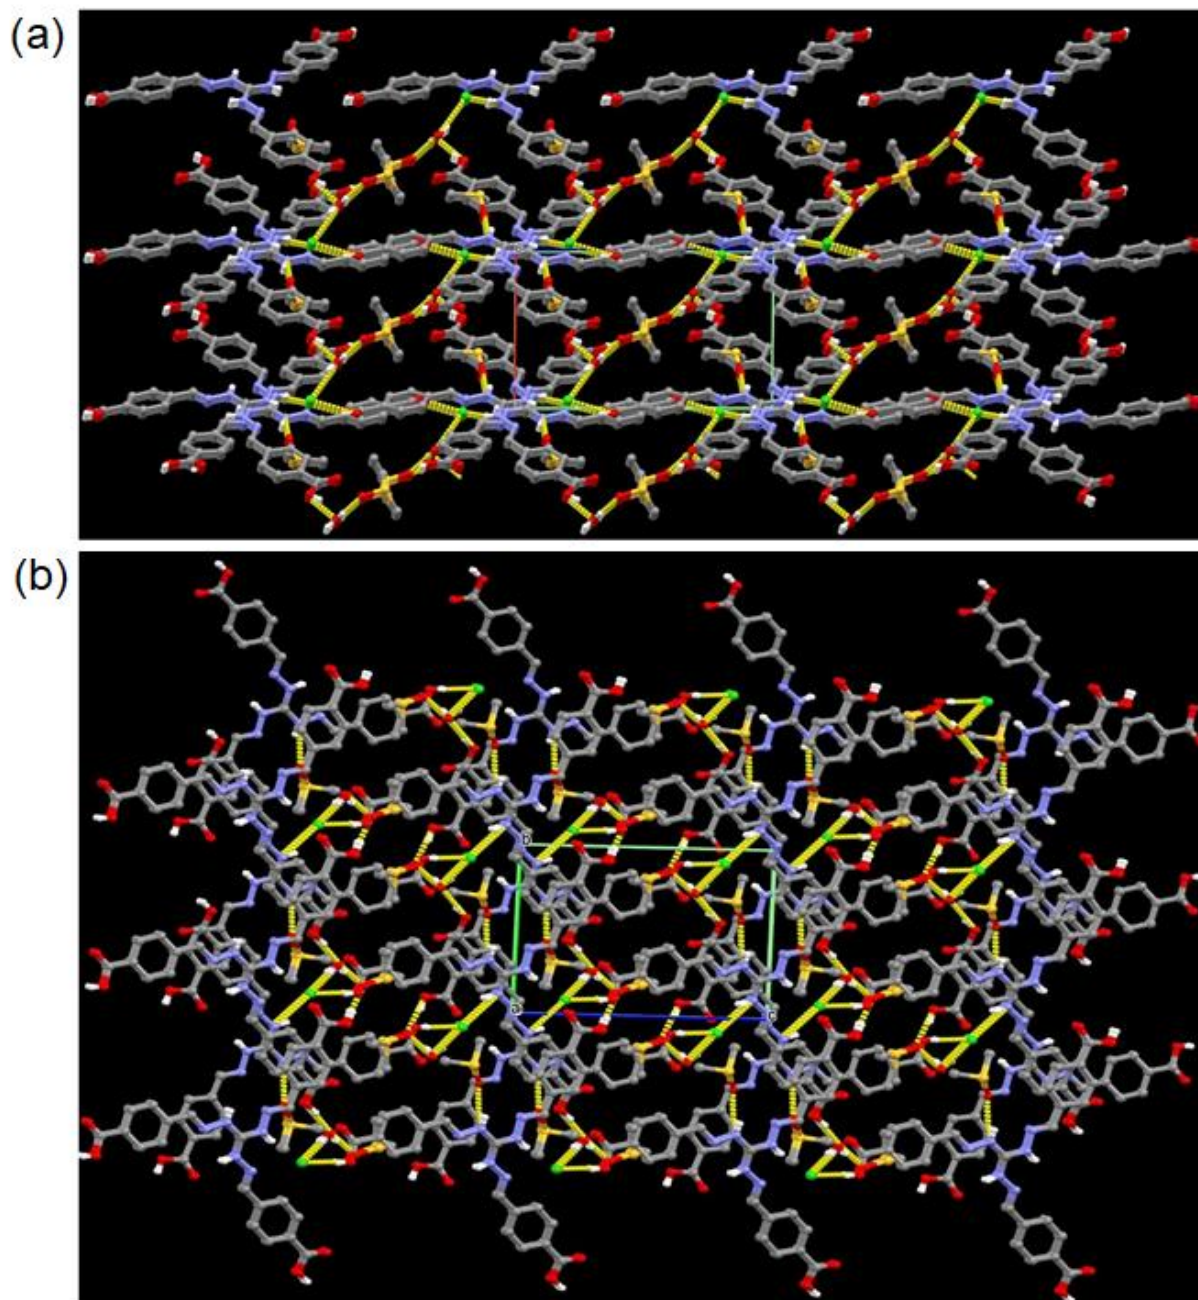

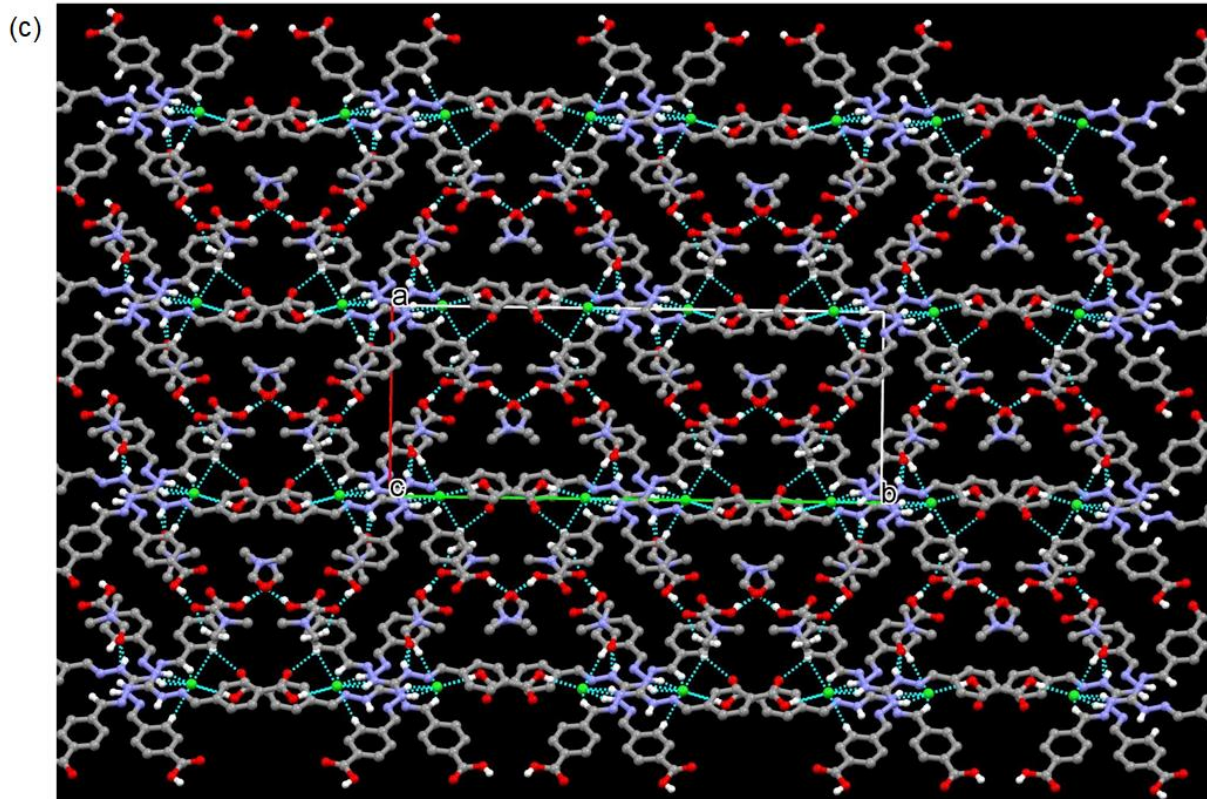

Figure S9: (a) Packing diagram with various hydrogen bonding interaction generating a 2D supramolecular network viewed down b-axis for crystal structure L1 grown in DMSO/water solvent system; (b) Packing diagram viewed down a-axis with various hydrogen bonding interaction generating a 2D supramolecular network viewed down a-axis for crystal structure L1 grown in DMSO/water solvent system. (c) Packing and H-bonding interaction viewed down the c-axis in depicting the supramolecular H-bonded network in L2 grown in DMF/water solvent system.

## 12. PXRD pattern of L in DMSO/water:

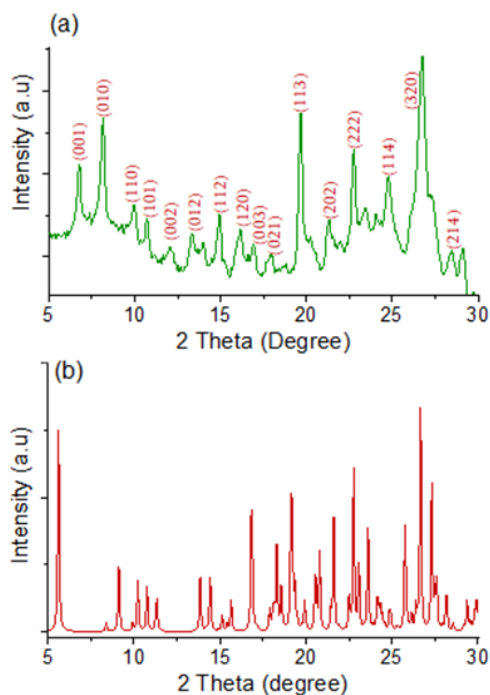

**Figure S10:** Wide-angle powder X-ray diffraction pattern recorded on (a) sedimentation of the self-assembled materials of L in DMSO/water (1:3 v/v); (b) Simulated XRD pattern obtained from the single crystal data.

## 13. FE-SEM image of L in DMSO/water (3:1 v/v):

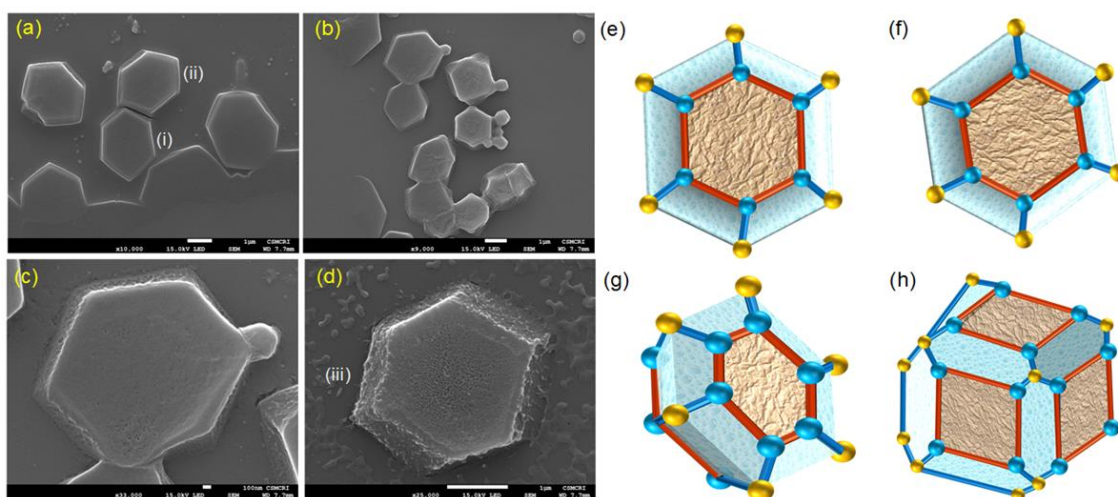

**Figure S11:** (a) – (d) FE-SEM image of self-assembled edge truncated triclinic morphology of L in DMSO/water (3:1 v/v) at a concentration of 1.0 mg/mL. Schematic representation of edge truncated triclinic morphology of their corresponding FE-SEM images (e) marked as (i); (f) marked as (ii); (g) marked as (iii) and edge truncated triclinic morphology with two distinct facets.



## 14. FE-SEM image of L in DMSO/water (1:1 v/v):

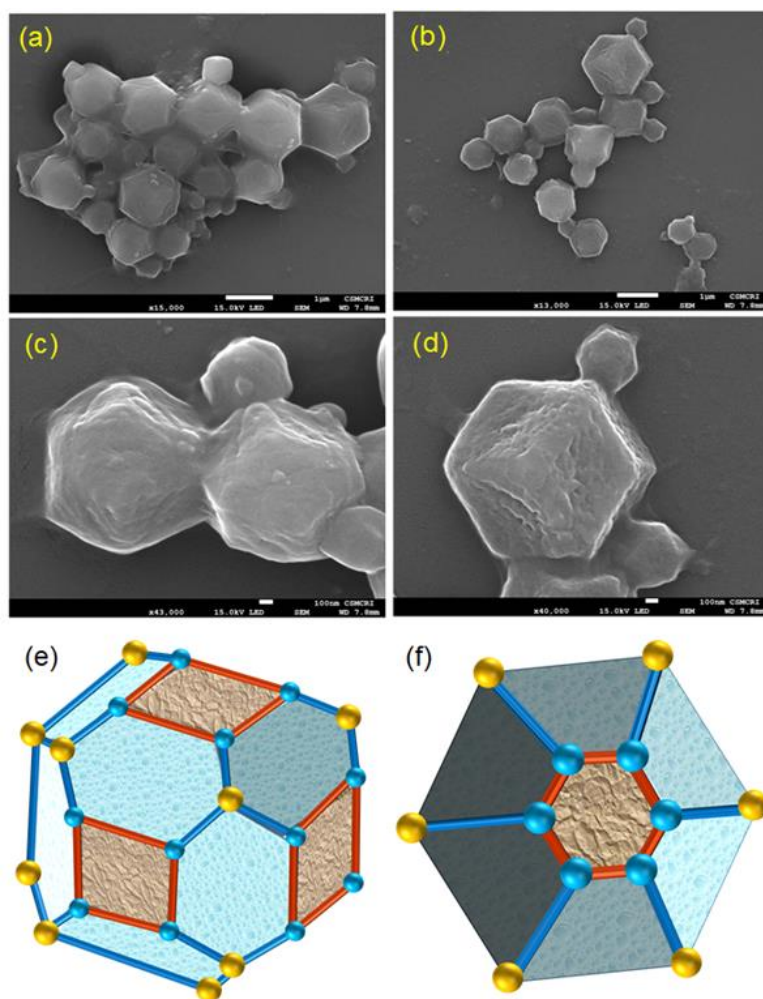

**Figure S12:** (a) – (d) FE-SEM image of self-assembled rhombi truncated triclinic morphology of L in DMSO/water (1:1 v/v) at a concentration of 1.0 mg/mL. Schematic representation of rhombi truncated triclinic morphology of their corresponding FE-SEM images with two distinct facets.

## 15. UV-Vis spectral data in DMF/water solvent:

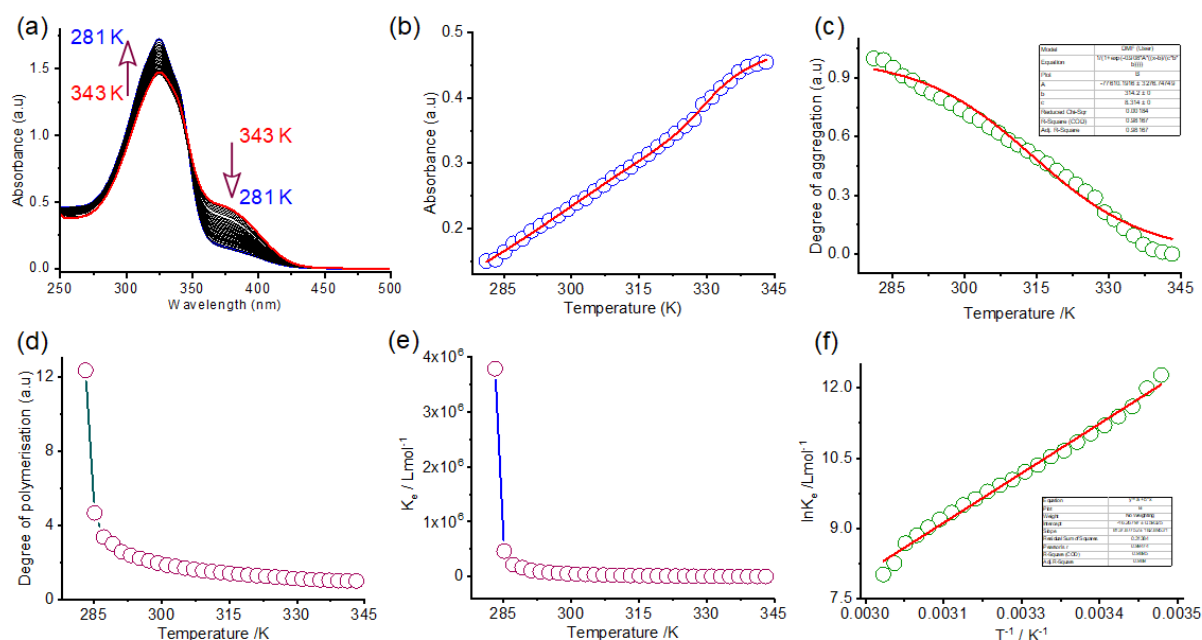

**Figure S13:** (a) Variable temperature UV-Vis spectra of L ( $3.7 \times 10^{-5}$  M) in DMF/water (1:3 v/v). (b) Corresponding plot of change of absorbance at 377 nm with temperature. (c) Temperature-dependent degree of aggregation, calculated from UV-Vis spectral change at 377 nm and corresponding isodesmic fit. (d) Corresponding plot of the degree of polymerization,  $DP_N$ , as a function of temperature. (e) Corresponding plot of the equilibrium constant,  $K_e$ , as a function of temperature. (f) Corresponding Van't Hoff plot for L in DMF/water (1:3 v/v).

## 16. Crystal data in DMF/water solvent:

60 mg of compound L was dissolved in 3 mL of DMF and taken in a screw-capped vial. After that, 100 microliter water was added. The solution was gently heated, then kept it in a 10 ml beaker with no mechanical disturbance for allowing the crystals of L to grow. After ~two to three weeks of high quality, yellow coloured crystals were obtained, which was used for X-ray diffraction.

**Table S3.** Parameters and refinement data for crystal L2, a DMF solvate of composition  $(C_{25}H_{21}N_6O_6) \cdot 3(C_3H_7NO) \cdot Cl$ , obtained from DMF/water solvent.

|                    |                        |
|--------------------|------------------------|
| Compound reference | L2                     |
| Chemical formula   | $C_{34}H_{42}ClN_9O_9$ |
| Formula Mass       | 756.22                 |
| Crystal system     | Monoclinic             |
| Space group        | $P2_1/c$               |

## SUPPORTING INFORMATION

|                                              |                       |
|----------------------------------------------|-----------------------|
| Crystal color                                | yellow                |
| Crystal size/mm <sup>3</sup>                 | 0.161 X 0.093 X 0.032 |
| <i>a</i> /Å                                  | 12.625(2)             |
| <i>b</i> /Å                                  | 32.160(6)             |
| <i>c</i> /Å                                  | 9.2409(17)            |
| $\alpha$ /°                                  | 90                    |
| $\beta$ /°                                   | 95.599(4)             |
| $\gamma$ /°                                  | 90                    |
| <i>V</i> /Å <sup>3</sup>                     | 3734.1(12)            |
| <i>Z</i>                                     | 4                     |
| <i>D<sub>x</sub></i> /g cm <sup>-3</sup>     | 1.345                 |
| $\mu$ (mm <sup>-1</sup> )                    | 0.168                 |
| F(000)                                       | 1592                  |
| <i>T</i> /°K                                 | 150(2)                |
| Total reflns                                 | 18607                 |
| R(int)                                       | 0.0863                |
| Unique reflns                                | 6556                  |
| Observed reflns ( <i>I</i> > 2σ( <i>I</i> )) | 4188                  |
| Parameters                                   | 634                   |
| R <sub>1</sub> ( <i>I</i> > 2σ( <i>I</i> ))  | 0.0946                |
| wR <sub>2</sub> (all reflns)                 | 0.1700                |
| GOF ( <i>F</i> <sup>2</sup> )                | 1.152                 |
| CCDC number                                  | 1961480               |

$$R_1 = \Sigma (||F_o| - |F_c||) / \Sigma |F_o|. \quad wR_2 = [\Sigma w(|F_o| - |F_c|)^2 / \Sigma w(F_o)^2]^{1/2}. \quad w = 0.75 / (\sigma^2(F_o) + 0.0010 F_o^2)$$



## 17. PXRD pattern of L in DMF/water:

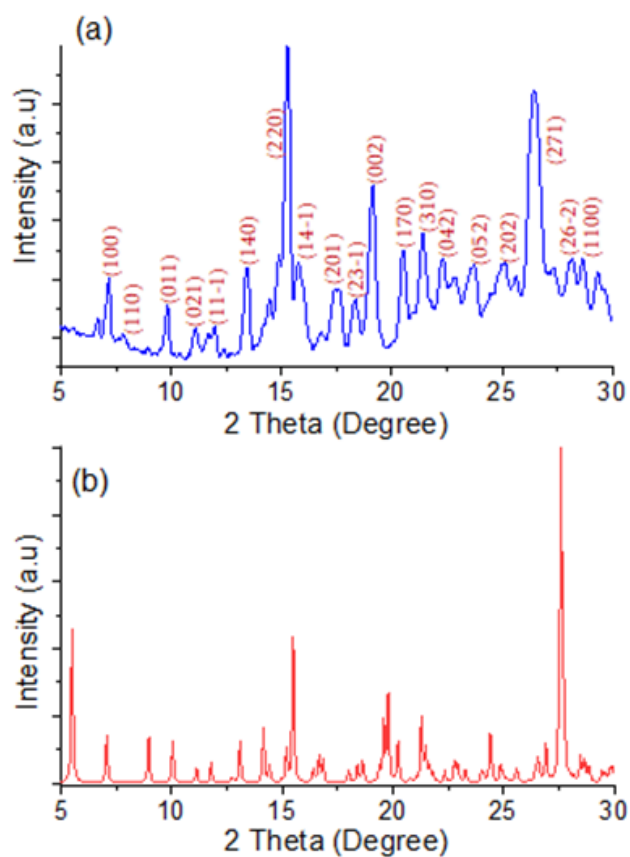

**Figure S14:** Wide-angle powder X-ray diffraction pattern recorded on (a) sedimentation of the self-assembled materials of L in DMF/water (1:3 v/v); (b) Simulated XRD pattern obtained from the single crystal data.

**References:**

- (1) G. M. Sheldrick, SAINT 5.1 ed., Siemens Industrial Automation Inc., Madison, WI, 1995.
- (2) SADABS, Empirical Absorption Correction Program, University of Göttingen, Göttingen, Germany, 1997
- (3) G. M. Sheldrick, SHELXTL Reference Manual: Version 5.1, Bruker AXS, Madison, WI, 1997
- (4) A. Maity, M. Gangopadhyay, A. Basu, S. Aute, S. S. Babu, and A. Das, *J. Am. Chem. Soc.* 2016, **138**, 11113–11116.
